# Supplementary material
Source: Springer Nature journal article supplement (https://www.springermedizin.de/resource/supplementary/12885_2013_4481_MOESM2_ESM.pdf/9466540)
Supplement: MOESM2 [file 9466540]

Enrollment process; obtain informed consent

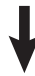

Record patient demographics, ECOG PS, vitals

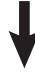

Diagnosis of recurrent or de novo disease?

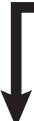

Recurrent

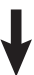

Take early BC history

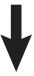

Assess TNM stage and pathology

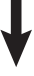

Determine hormone and HER2 receptor status

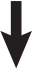

Start systemic therapy

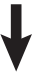

Surgery, radiotherapy

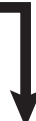

De novo

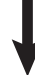

Take metastatic history

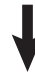

Identify site(s) of metastasis

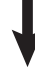

Start systemic therapy

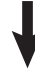

Palliative surgery

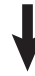

Palliative radiotherapy

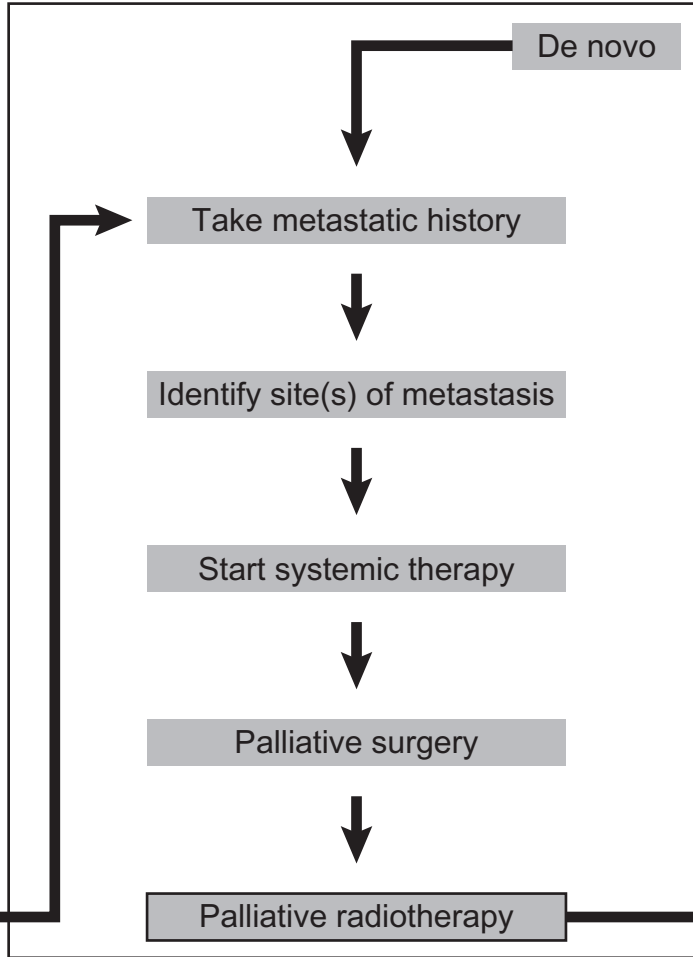

Cardiovascular assessment;  
Other past medical history;  
Concomitant medications;  
Laboratory results; Baseline CRFs complete
